# Supplementary material for: Cross-institutional outcome prediction for head and neck cancer patients using self-attention neural networks
Source: PubMed Central journal article supplement (PMC8873259; doi:10.1038/s41598-022-07034-5), 2022-02-24
Supplement: 41598_2022_7034_MOESM1_ESM.pdf [file 41598_2022_7034_MOESM1_ESM.pdf]

## Appendix

**Table S1.** Model performance on the Internal CHUM dataset using a randomized 5-fold cross-validation. Comparison between CT+clinical and PET+CT+clinical input modalities. Clinical data is included in all cases. Accuracy is normalized per class frequency.

| Input           | Metric      | DM                      | LR                      | OS                      |
|-----------------|-------------|-------------------------|-------------------------|-------------------------|
| CT+clinical     | Accuracy    | <b>68.9 [68.6-69.3]</b> | <b>74.1 [67.6-80.6]</b> | <b>74.2 [67.7-80.5]</b> |
|                 | Specificity | <b>85.3 [80.8-89.9]</b> | <b>73.1 [58.9-88.2]</b> | <b>72.9 [60.2-84.3]</b> |
|                 | Sensitivity | <b>52.5 [47.6-57.4]</b> | 75.0 [65.9-85.3]        | <b>75.0 [64.0-85.8]</b> |
|                 | AUROC       | <b>65.3 [62.1-68.4]</b> | <b>68.3 [58.1-78.6]</b> | <b>68.2 [63.5-73.0]</b> |
| PET+CT+clinical | Accuracy    | 65.2 [58.1-72.4]        | 66.8 [61.8-71.9]        | 62.4 [58.7-66.2]        |
|                 | Specificity | 82.8 [71.2-94.4]        | 58.3 [40.2-76.4]        | 57.6 [31.7-83.5]        |
|                 | Sensitivity | 47.8 [28.9-66.7]        | <b>75.4 [61.5-89.4]</b> | 67.3 [43.3-91.4]        |
|                 | AUROC       | 64.7 [50.6-78.7]        | 58.8 [47.9-69.7]        | 55.4 [48.5-62.2]        |

**Table S2.** Ablation performance of models using all possible input modalities. Figures are *Mean [95 % Confidence Interval]* over 5 trials with different seeds. AUROC is computed on the Receiver operating characteristic curve. Statistical significance testing is computed using the Mann-Whitney U test with Bonferroni correction against the proposed model. Stars indicate statistical significance using the dependent t-test for paired samples, with the number of stars indicating: 1)  $p < 0.05$ , 2)  $p < 0.01$ .

|    | 3D | Preprocessor | Self-Attention | AUROC                   | Statistical Significance |
|----|----|--------------|----------------|-------------------------|--------------------------|
| DM | ✓  | ✓            | ✓              | <b>79.8 [77.0–82.7]</b> | —                        |
| DM | ✓  |              | ✓              | 66.2 [61.5–71.0]        | *                        |
| DM | ✓  | ✓            |                | 63.5 [58.8–68.3]        | *                        |
| DM | ✓  |              |                | 63.2 [61.5–65.0]        | *                        |
| DM |    | ✓            | ✓              | 60.6 [55.7–65.5]        | *                        |
| DM |    |              | ✓              | 62.9 [59.2–66.2]        | *                        |
| DM |    | ✓            |                | 62.8 [56.1–69.5]        | *                        |
| DM |    |              |                | 65.7 [62.6–68.8]        | *                        |
| LR | ✓  | ✓            | ✓              | <b>78.8 [77.0–80.5]</b> | —                        |
| LR | ✓  |              | ✓              | 63.8 [56.1–71.5]        | *                        |
| LR | ✓  | ✓            |                | 65.0 [61.1–69.0]        | *                        |
| LR | ✓  |              |                | 70.5 [64.3–76.5]        |                          |
| LR |    | ✓            | ✓              | 66.8 [60.8–72.9]        | *                        |
| LR |    |              | ✓              | 70.3 [63.5–77.2]        |                          |
| LR |    | ✓            |                | 68.2 [60.8–75.6]        | *                        |
| LR |    |              |                | 68.8 [67.1–70.4]        | *                        |
| OS | ✓  | ✓            | ✓              | <b>82.0 [80.2–83.9]</b> | —                        |
| OS | ✓  |              | ✓              | 77.4 [74.5–80.2]        |                          |
| OS | ✓  | ✓            |                | 78.8 [76.0–81.6]        |                          |
| OS | ✓  |              |                | 82.2 [81.0–83.3]        |                          |
| OS |    | ✓            | ✓              | 72.6 [67.0–78.2]        | *                        |
| OS |    |              | ✓              | 75.4 [73.3–77.5]        | *                        |
| OS |    | ✓            |                | 77.6 [76.7–78.4]        | *                        |
| OS |    |              |                | 75.7 [72.4–79.0]        | *                        |

**Table S3.** Ablation performance of pseudo-3D models on samples from HMR and CHUM. Figures are means over 5 trials with different seeds. AUROC is computed on the Receiver operating characteristic curve. Accuracy is balanced for class distribution.

| Label | Preprocessor | Attention | CT | clinical | PET | AUROC (%)   | CI (95%)     | Accuracy (%) | Specificity (%) | Sensitivity (%) |
|-------|--------------|-----------|----|----------|-----|-------------|--------------|--------------|-----------------|-----------------|
| DM    | ✓            | ✓         | ✓  | ✓        | ✓   | <b>79.8</b> | [77.0–82.7]  | <b>74.5</b>  | <b>84.9</b>     | 64.2            |
| DM    | ✓            | ✓         | ✓  |          | ✓   | 60.6        | [52.3–68.9]  | 60.6         | 55.4            | 65.7            |
| DM    | ✓            | ✓         | ✓  | ✓        |     | 65.1        | [62.9–67.4]  | 68.1         | 64.8            | 71.4            |
| DM    | ✓            | ✓         | ✓  |          |     | 57.0        | [47.1–66.9]  | 63.8         | 53.3            | 74.3            |
| DM    |              | ✓         | ✓  | ✓        | ✓   | 66.2        | [61.5–71.0]  | 65.0         | 70.0            | 60.0            |
| DM    |              | ✓         | ✓  |          | ✓   | 59.1        | [51.0–67.2]  | 63.1         | 59.1            | 67.1            |
| DM    |              | ✓         | ✓  | ✓        |     | 64.8        | [63.3–66.4]  | 68.0         | 60.2            | 75.7            |
| DM    |              | ✓         | ✓  |          |     | 66.8        | [64.8–68.8]  | 67.2         | 64.4            | 70.0            |
| DM    | ✓            |           | ✓  | ✓        | ✓   | 63.5        | [58.8–68.3]  | 65.4         | 66.5            | 64.3            |
| DM    | ✓            |           | ✓  |          | ✓   | 52.8        | [45.5–60.0]  | 57.4         | 30.4            | <b>84.3</b>     |
| DM    | ✓            |           | ✓  | ✓        |     | 66.7        | [63.1–70.4]  | 69.1         | 61.1            | 77.1            |
| DM    | ✓            |           | ✓  |          |     | 54.0        | [46.9–61.1]  | 58.8         | 46.1            | 71.4            |
| DM    |              |           | ✓  | ✓        | ✓   | 63.2        | [61.5–65.0]  | 64.4         | 60.2            | 68.6            |
| DM    |              |           | ✓  |          | ✓   | 47.9        | [43.22–52.6] | 56.6         | 54.6            | 58.6            |
| DM    |              |           | ✓  | ✓        |     | 67.4        | [65.1–69.7]  | 65.8         | 68.7            | 62.9            |
| DM    |              |           | ✓  |          |     | 54.3        | [51.5–57.2]  | 55.8         | 53.0            | 58.6            |
| LR    | ✓            | ✓         | ✓  | ✓        | ✓   | <b>78.8</b> | [77.0–80.5]  | <b>74.2</b>  | 81.0            | 67.5            |
| LR    | ✓            | ✓         | ✓  |          | ✓   | 59.3        | [52.5–66.2]  | 64.2         | 48.4            | 80.0            |
| LR    | ✓            | ✓         | ✓  | ✓        |     | 66.0        | [63.7–68.4]  | 63.8         | 77.6            | 50.0            |
| LR    | ✓            | ✓         | ✓  |          |     | 61.0        | [53.0–69.0]  | 62.8         | 49.3            | 76.3            |
| LR    |              | ✓         | ✓  | ✓        | ✓   | 63.8        | [56.1–71.5]  | 65.1         | 65.1            | 65.0            |
| LR    |              | ✓         | ✓  |          | ✓   | 71.7        | [67.4–75.9]  | 68.3         | 74.0            | 62.5            |
| LR    |              | ✓         | ✓  | ✓        |     | 74.6        | [68.9–80.3]  | 70.6         | 62.4            | 78.8            |
| LR    |              | ✓         | ✓  |          |     | 66.9        | [60.9–72.8]  | 68.5         | 64.4            | 72.5            |
| LR    | ✓            |           | ✓  | ✓        | ✓   | 65.0        | [61.1–69.0]  | 64.9         | 66.0            | 63.8            |
| LR    | ✓            |           | ✓  |          | ✓   | 64.4        | [57.7–71.2]  | 64.9         | 57.3            | 72.5            |
| LR    | ✓            |           | ✓  | ✓        |     | 67.0        | [64.8–69.1]  | 68.4         | 74.2            | 62.5            |
| LR    | ✓            |           | ✓  |          |     | 65.9        | [61.3–70.4]  | 64.3         | 53.6            | 75.0            |
| LR    |              |           | ✓  | ✓        | ✓   | 70.4        | [64.3–76.5]  | 68.1         | 77.3            | 58.8            |
| LR    |              |           | ✓  |          | ✓   | 59.9        | [52.4–67.4]  | 61.8         | 41.1            | <b>82.5</b>     |
| LR    |              |           | ✓  | ✓        |     | 68.4        | [62.0–74.7]  | 68.0         | <b>82.2</b>     | 53.8            |
| LR    |              |           | ✓  |          |     | 67.0        | [64.7–69.2]  | 64.8         | 57.1            | 72.5            |
| OS    | ✓            | ✓         | ✓  | ✓        | ✓   | 82.0        | [80.2–83.9]  | 78.7         | 80.7            | 76.7            |
| OS    | ✓            | ✓         | ✓  |          | ✓   | 56.5        | [51.5–61.4]  | 57.3         | 58.8            | 55.8            |
| OS    | ✓            | ✓         | ✓  | ✓        |     | 82.0        | [79.7–84.3]  | <b>79.5</b>  | 77.3            | 81.7            |
| OS    | ✓            | ✓         | ✓  |          |     | 68.5        | [65.6–71.5]  | 66.3         | 57.6            | 75.0            |
| OS    |              | ✓         | ✓  | ✓        | ✓   | 77.4        | [74.5–80.2]  | 73.6         | 71.5            | 75.8            |
| OS    |              | ✓         | ✓  |          | ✓   | 59.2        | [53.6–64.9]  | 56.5         | 50.5            | 62.5            |
| OS    |              | ✓         | ✓  | ✓        |     | 80.7        | [77.9–83.5]  | 78.2         | 72.2            | <b>84.2</b>     |
| OS    |              | ✓         | ✓  |          |     | 72.2        | [70.0–74.4]  | 71.8         | 59.5            | <b>84.2</b>     |
| OS    | ✓            |           | ✓  | ✓        | ✓   | 78.8        | [76.0–81.6]  | 76.0         | <b>82.0</b>     | 70.0            |
| OS    | ✓            |           | ✓  |          | ✓   | 59.5        | [52.4–66.6]  | 60.0         | 43.4            | 76.7            |
| OS    | ✓            |           | ✓  | ✓        |     | 80.5        | [77.9–83.2]  | 77.7         | 75.4            | 80.0            |
| OS    | ✓            |           | ✓  |          |     | 58.7        | [48.2–69.1]  | 61.7         | 50.0            | 73.3            |
| OS    |              |           | ✓  | ✓        | ✓   | 82.2        | [81.0–83.3]  | 79.8         | 80.5            | 79.2            |
| OS    |              |           | ✓  |          | ✓   | 70.3        | [69.0–71.6]  | 66.7         | 61.7            | 71.7            |
| OS    |              |           | ✓  | ✓        |     | <b>83.7</b> | [83.2–84.2]  | 78.3         | 78.3            | 78.3            |
| OS    |              |           | ✓  |          |     | 71.8        | [69.7–73.9]  | 71.6         | 61.5            | 81.7            |

**Table S4.** Ablation performance of 2D models on samples from HMR and CHUM. Figures are means over 5 trials with different seeds. AUROC is computed on the Receiver operating characteristic curve. Accuracy is balanced for class distribution.

| Label | Preprocessor | Attention | CT | clinical | PET | AUROC (%)   | CI (95%)    | Accuracy (%) | Specificity (%) | Sensitivity (%) |
|-------|--------------|-----------|----|----------|-----|-------------|-------------|--------------|-----------------|-----------------|
| DM    | ✓            | ✓         | ✓  | ✓        | ✓   | 60.6        | [56.0–65.5] | 59.3         | 54.7            | 63.9            |
| DM    | ✓            | ✓         | ✓  | ✓        | ✓   | 64.6        | [58.8–70.5] | 62.9         | 61.3            | 64.5            |
| DM    | ✓            | ✓         | ✓  | ✓        | ✓   | 68.3        | [66.6–70.1] | 63.2         | 72.5            | 53.9            |
| DM    | ✓            | ✓         | ✓  | ✓        | ✓   | 67.0        | [64.2–69.7] | 62.0         | 65.1            | 58.9            |
| DM    |              | ✓         | ✓  | ✓        | ✓   | 62.7        | [59.2–66.2] | 61.3         | 51.1            | 71.5            |
| DM    |              | ✓         | ✓  | ✓        | ✓   | 66.8        | [66.0–67.6] | 62.5         | <b>78.6</b>     | 46.5            |
| DM    |              | ✓         | ✓  | ✓        | ✓   | 66.9        | [60.4–73.4] | 63.6         | 71.8            | 55.4            |
| DM    |              | ✓         | ✓  | ✓        | ✓   | 75.2        | [73.7–76.7] | 71.9         | 68.7            | 75.1            |
| DM    | ✓            |           | ✓  | ✓        | ✓   | 62.8        | [56.1–69.5] | 58.8         | 67.2            | 50.4            |
| DM    | ✓            |           | ✓  | ✓        | ✓   | 69.5        | [66.7–72.3] | 64.5         | 70.7            | 58.3            |
| DM    | ✓            |           | ✓  | ✓        | ✓   | 69.5        | [66.7–72.4] | 57.4         | 30.4            | 84.3            |
| DM    | ✓            |           | ✓  | ✓        | ✓   | <b>83.8</b> | [82.5–85.0] | <b>80.3</b>  | 72.1            | 88.5            |
| DM    |              |           | ✓  | ✓        | ✓   | 65.7        | [62.6–68.8] | 62.5         | 65.8            | 59.1            |
| DM    |              |           | ✓  | ✓        | ✓   | 54.9        | [52.5–57.2] | 51.3         | 52.7            | <b>99.9</b>     |
| DM    |              |           | ✓  | ✓        | ✓   | 66.1        | [62.8–69.5] | 61.0         | 57.0            | 64.9            |
| DM    |              |           | ✓  | ✓        | ✓   | 65.5        | [64.9–66.1] | 64.3         | 63.3            | 65.3            |
| LR    | ✓            | ✓         | ✓  | ✓        | ✓   | 66.8        | [60.8–72.9] | 62.3         | 66.1            | 58.6            |
| LR    | ✓            | ✓         | ✓  | ✓        | ✓   | 59.2        | [53.5–64.9] | 63.2         | 70.1            | 56.3            |
| LR    | ✓            | ✓         | ✓  | ✓        | ✓   | 64.0        | [59.0–69.0] | 63.6         | 87.4            | 39.9            |
| LR    | ✓            | ✓         | ✓  | ✓        | ✓   | 66.6        | [60.2–73.0] | 63.7         | 86.2            | 41.2            |
| LR    |              | ✓         | ✓  | ✓        | ✓   | 70.3        | [63.5–77.2] | 65.1         | 63.7            | 66.4            |
| LR    |              | ✓         | ✓  | ✓        | ✓   | 69.3        | [62.0–76.5] | 64.9         | 86.8            | 42.9            |
| LR    |              | ✓         | ✓  | ✓        | ✓   | 65.1        | [63.0–67.1] | 64.4         | 86.0            | 42.8            |
| LR    |              | ✓         | ✓  | ✓        | ✓   | 55.4        | [47.4–63.3] | 57.2         | 86.2            | 28.3            |
| LR    | ✓            |           | ✓  | ✓        | ✓   | 68.2        | [60.8–75.6] | 64.8         | 72.6            | 56.9            |
| LR    | ✓            |           | ✓  | ✓        | ✓   | 62.6        | [55.7–69.6] | 63.2         | 86.6            | 39.8            |
| LR    | ✓            |           | ✓  | ✓        | ✓   | 64.4        | [57.7–71.2] | 64.9         | 57.3            | <b>72.5</b>     |
| LR    | ✓            |           | ✓  | ✓        | ✓   | 57.9        | [55.8–60.0] | 57.0         | 76.9            | 37.2            |
| LR    |              |           | ✓  | ✓        | ✓   | 68.8        | [67.1–70.4] | 63.8         | 83.0            | 44.5            |
| LR    |              |           | ✓  | ✓        | ✓   | 61.3        | [60.0–62.5] | 61.0         | 70.6            | 51.5            |
| LR    |              |           | ✓  | ✓        | ✓   | <b>73.1</b> | [68.8–77.3] | <b>66.4</b>  | 92.1            | 40.8            |
| LR    |              |           | ✓  | ✓        | ✓   | 51.6        | [51.3–51.8] | 50.0         | <b>100.0</b>    | 0.0             |
| OS    | ✓            | ✓         | ✓  | ✓        | ✓   | 72.6        | [67.0–78.2] | 66.3         | 65.8            | 66.8            |
| OS    | ✓            | ✓         | ✓  | ✓        | ✓   | 73.4        | [71.9–74.8] | 68.2         | 65.2            | 71.2            |
| OS    | ✓            | ✓         | ✓  | ✓        | ✓   | 74.2        | [70.4–77.9] | <b>73.1</b>  | <b>82.9</b>     | 63.4            |
| OS    | ✓            | ✓         | ✓  | ✓        | ✓   | 76.7        | [74.8–78.6] | 70.8         | 69.1            | 72.4            |
| OS    |              | ✓         | ✓  | ✓        | ✓   | 75.4        | [73.3–77.5] | 68.4         | 62.7            | 74.2            |
| OS    |              | ✓         | ✓  | ✓        | ✓   | 74.8        | [71.0–78.6] | 72.1         | 77.5            | 66.8            |
| OS    |              | ✓         | ✓  | ✓        | ✓   | 75.4        | [73.2–77.7] | 69.2         | 65.4            | 73.0            |
| OS    |              | ✓         | ✓  | ✓        | ✓   | 73.1        | [71.1–75.1] | 69.4         | 66.9            | 71.8            |
| OS    | ✓            |           | ✓  | ✓        | ✓   | <b>77.6</b> | [76.7–78.4] | 66.7         | 56.9            | 76.6            |
| OS    | ✓            |           | ✓  | ✓        | ✓   | 76.6        | [74.5–78.7] | 71.9         | 75.5            | 68.2            |
| OS    | ✓            |           | ✓  | ✓        | ✓   | 74.9        | [70.9–79.0] | 73.0         | 79.9            | 66.0            |
| OS    | ✓            |           | ✓  | ✓        | ✓   | 75.0        | [71.9–78.1] | 70.1         | 76.2            | 64.0            |
| OS    |              |           | ✓  | ✓        | ✓   | 75.7        | [72.4–79.0] | 67.6         | 60.5            | 74.7            |
| OS    |              |           | ✓  | ✓        | ✓   | 59.3        | [56.3–62.3] | 50.0         | 0.0             | <b>100.0</b>    |
| OS    |              |           | ✓  | ✓        | ✓   | 75.4        | [70.5–80.2] | 68.8         | 62.5            | 75.1            |
| OS    |              |           | ✓  | ✓        | ✓   | 62.1        | [61.6–62.6] | 50.0         | 0.0             | <b>100.0</b>    |

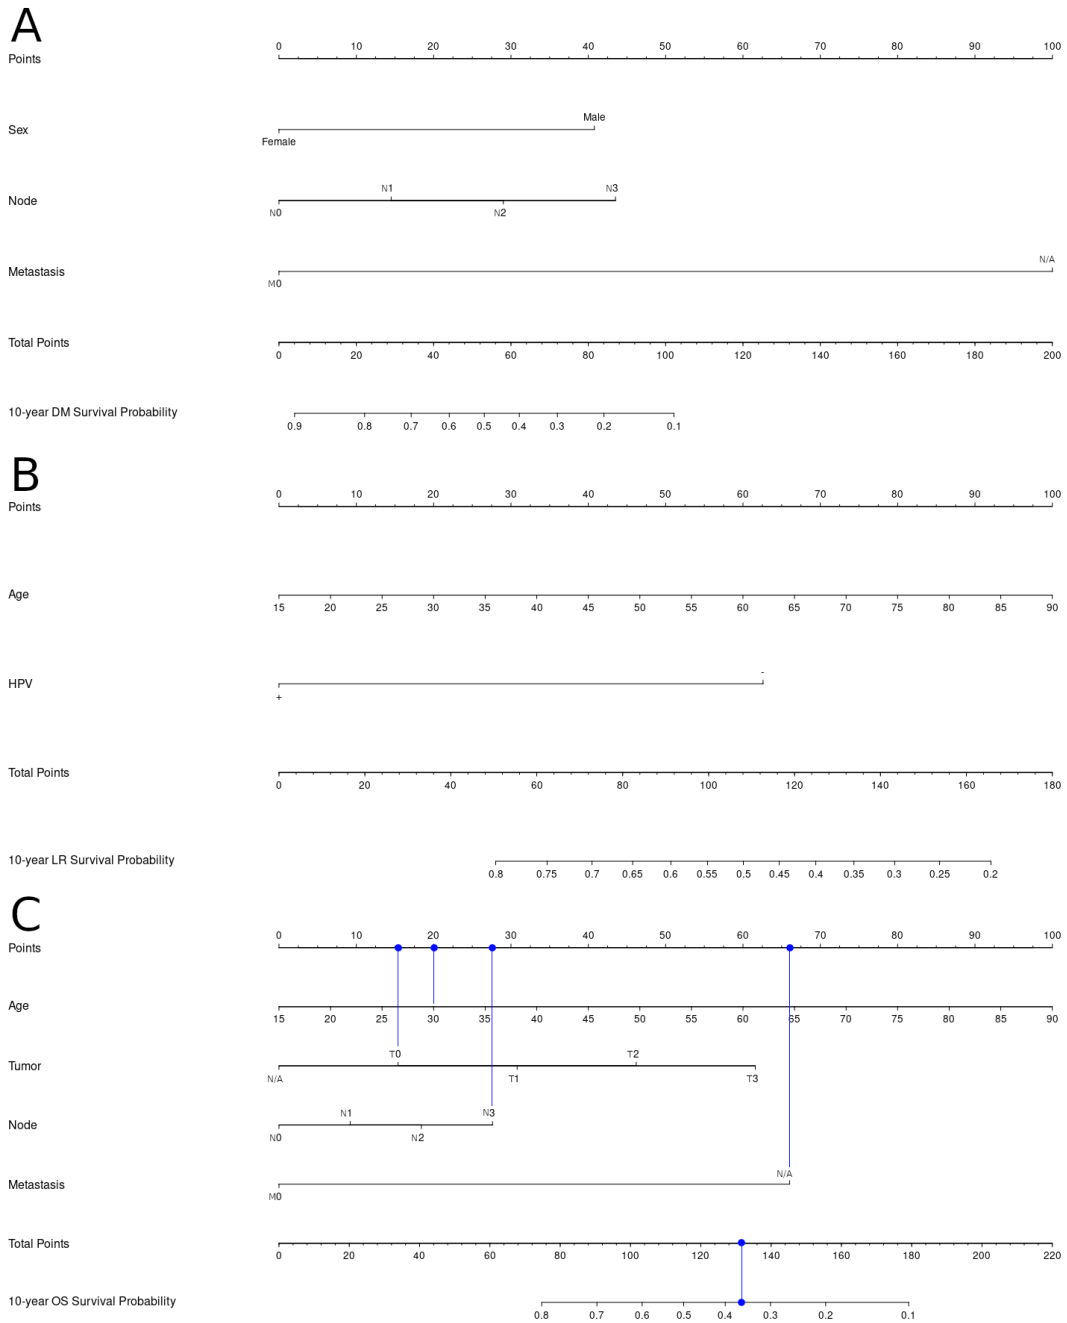

**Figure S1.** Nomograms predicting 10 years survival outcome for the predicted events: A) DM, B) LR, C) OS. The model used was a Cox's Proportional Hazard model<sup>38</sup> trained on the TCIA dataset's clinical factors. The included model features were optimized by minimizing the Akaike Information Criterion. The training samples included only those from CHUS and HGJ institutions. **To read:** draw a vertical line from each factor to the Points line and perpendicular to both (factor and points lines), calculate the total sum of points and draw a line from that total sum value on the Total Points line, to the 10-year survival line. The probability for the outcome is where the line crosses the 10-year survival probability via an intersection line, also perpendicular to both total points and 10-year survival probability lines. **Example** (blue vertical lines, C): patient with *age*=30 (20 points), and scores for *tumor*=T0 (15 points), *node*=N3 (27.5 points) and *metastasis*=unknown (66 points). The total sum of 128.5 points gives a score of 36% chance of survival after 10 years for OS. Figure created with the "rms" package v6.2 (cran.r-project.org/web/packages/rms).
